# Supplementary material
Source: ML conference proceedings conference paper supplement (https://proceedings.neurips.cc/paper_files/paper/2022/hash/b645d1a085bcb39bece5c03703b62464-Abstract.html)
Supplement: Supplementary file 1 [file b645d1a085bcb39bece5c03703b62464-Supplemental-Datasets_and_Benchmarks.zip]

Archive with 6 entries (6 files):
- ikea_manual_supp.pdf
- __MACOSX/._ikea_manual_supp.pdf
- connection_segmentation_annotation.mp4
- __MACOSX/._connection_segmentation_annotation.mp4
- keypoint_annotation.mp4
- __MACOSX/._keypoint_annotation.mp4
